# Supplementary material for: Single-walled carbon nanotube layers for millimeter-wave beam steering
Source: Royal Society of Chemistry journal article supplement (doi:10.1039/c9nr02705j), 2019-01-01
Supplement: c9nr02705j1.pdf [file c9nr02705j1.pdf]

## Supporting Information

# Single-walled carbon nanotube layers for millimeter-wave beam steering

*Serguei Smirnov, Dmitri V. Lioubtchenko,\* and Joachim Oberhammer*

Department of Micro and Nanosystems, KTH Royal Institute of Technology,

Malvinas väg 10, SE-100 44 Stockholm, Sweden.

\*E-mail: [dml@kth.se](mailto:dml@kth.se)

## Supporting Figures

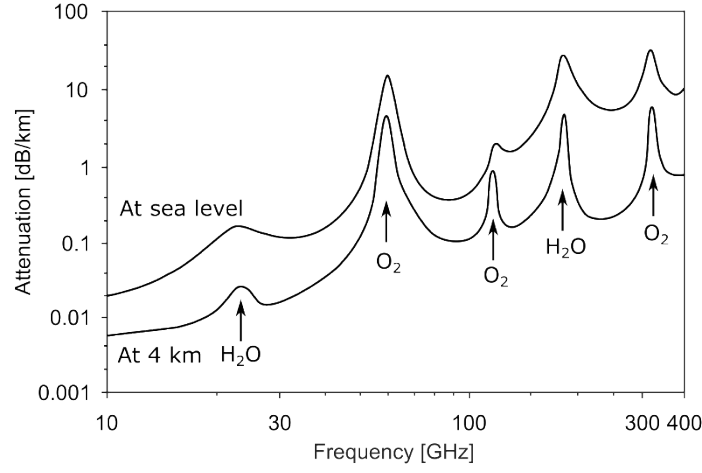

**Figure S1.** Average atmospheric absorption of millimeter-waves at sea level and at 4 km of altitude.<sup>1</sup> The arrows indicate oxygen and water vapor absorption peaks.

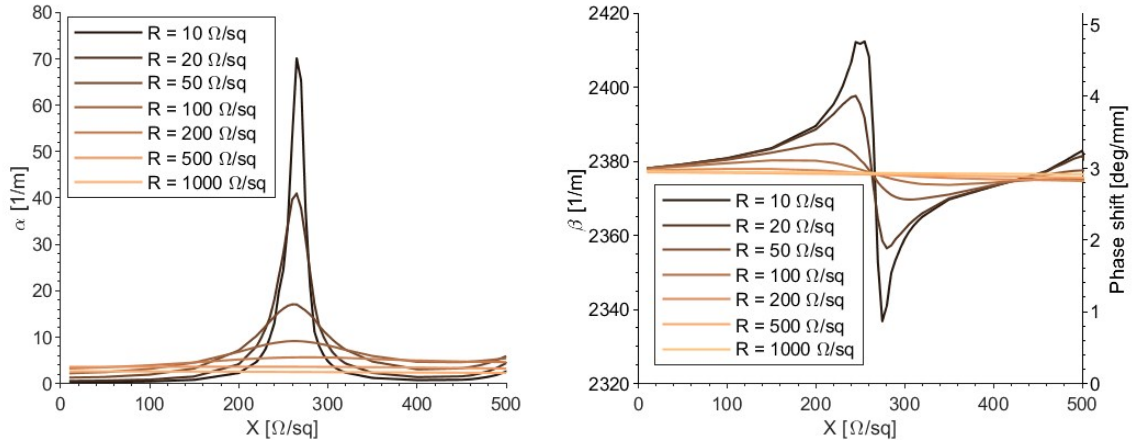

**Figure S2.** Simulated attenuation constant ( $\alpha$ ) and phase constant ( $\beta$ ) of an electromagnetic wave propagating along the  $z$  axis at 90 GHz for a sapphire dielectric rod waveguide (DRW) with a cross-section of 0.4 mm by 0.8 mm and varying surface impedance values  $Z(\omega) = R(\omega) - jX(\omega)$

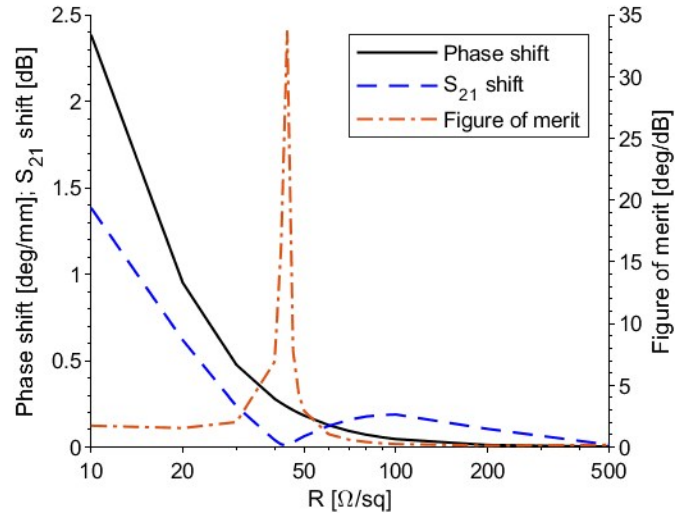

**Figure S3.** Simulated figure of merit of the phase shifter at 90 GHz for varying  $R$  and fixed  $X = 185\text{--}205\ \Omega\ \text{sq}^{-1}$ .

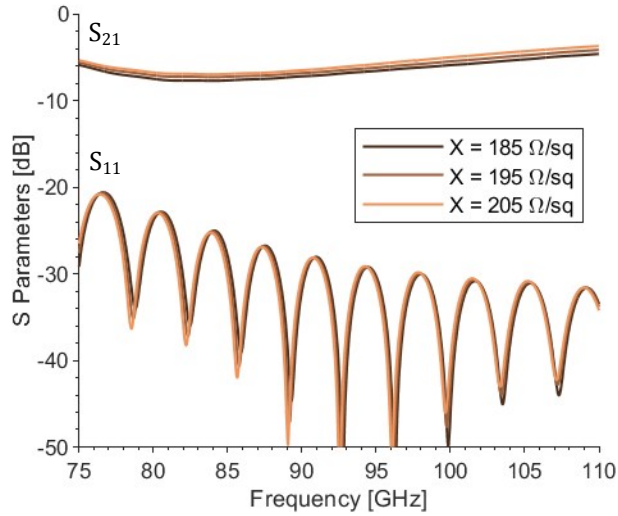

**Figure S4.** Simulated S-parameters of a 10-mm long phase shifter with fixed  $R = 44\ \Omega\ \text{sq}^{-1}$  and varying  $X$  between  $185\ \Omega\ \text{sq}^{-1}$  and  $205\ \Omega\ \text{sq}^{-1}$ .

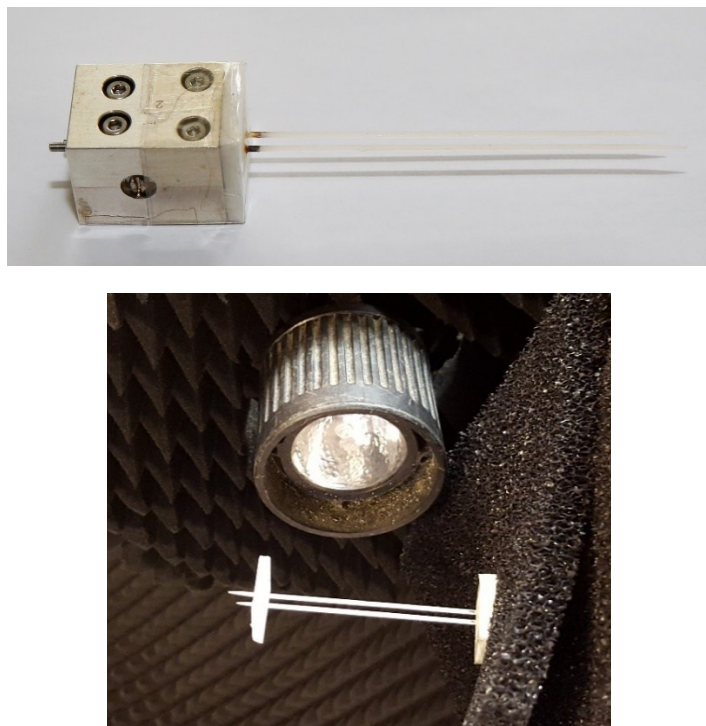

**Figure S5.** Beam steering measurement setup: WR-10 power divider block with dual-DRW antenna array. Illumination of the SWCNT layer with a tungsten halogen lamp. A slight misalignment between the antennas can be seen.

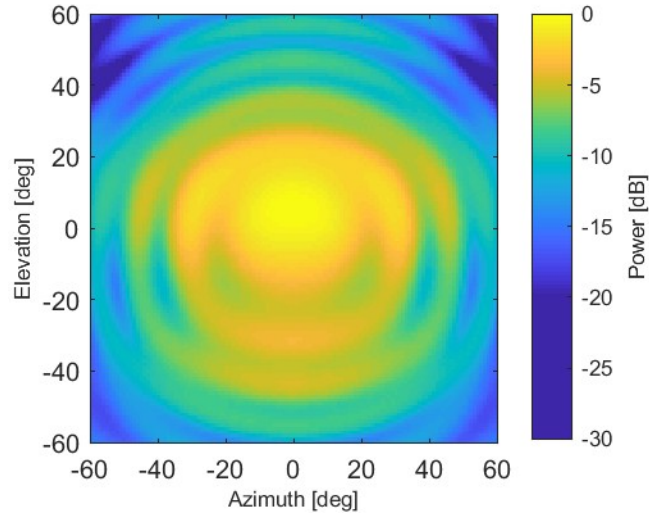

**Figure S6.** Simulated radiation pattern of the two-antenna array with a layer of SWCNTs at 90 GHz. Beam steering of approximately 10 degrees is observed due to impedance change of the SWCNT layer.

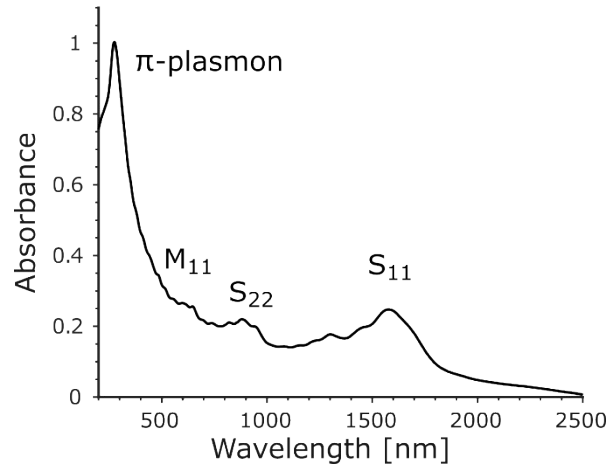

**Figure S7.** Optical absorbance spectrum of the SWCNT layer.<sup>2</sup>

## References

1. Marcus, M.; Pattan, B., Millimeter wave propagation: spectrum management implications. *IEEE Microwave Magazine* **2005**, 6 (2), 54-62.
2. Smirnov, S.; Anoshkin, I. V.; Demchenko, P.; Gomon, D.; Lioubtchenko, D. V.; Khodzitsky, M.; Oberhammer, J., Optically Controlled Dielectric Properties of Single-Walled Carbon Nanotubes for Terahertz Wave Applications. *Nanoscale* **2018**, 10 (26), 12291-12296.
